# Supplementary material for: Gamebird responses to anthropogenic forest fragmentation and degradation in a southern Amazonian landscape
Source: PeerJ. 2017 Jun 7;5:e3442. doi: 10.7717/peerj.3442 (PMC5466001; doi:10.7717/peerj.3442)
Supplement: Appendix S2 — Coordinates, forest patch area, and records of field observations of six gamebird taxa within 21 forest patches and two ‘pseudo-controls’ surveyed across the landscape around Alta Floresta, Mato Grosso, Brazil. [file peerj-05-3442-s002.xlsx]

## Sheet: Sheet1
Site	Easting	Northing	Area_log	Mitu_tuberosum	Odontophorus_gujanensis	Penelope_jacquacu	Pipile_cujubi	Psophia_viridis	Tinamus_spp
151	606548	8922174	0.38	0	0	0	0	0	0
156	604780	8904769	0.613	0	0	0	0	0	0
143	603647	8904635	0.663	0	0	0	0	0	0
153	609083	8912139	0.672	0	0	0	0	0	0
7	597603	8900339	0.82	0	0	0	0	0	0
154	621447	8913824	0.863	0	0	0	0	0	0
42	605615	8918562	1.173	0	0	0	0	0	0
145	611310	8910830	1.204	0	0	0	0.496	0	0
94	620602	8909122	1.332	0	0	0	0	0	0
131	577056	8931486	1.389	0	0	7.069	1.247	0	0.416
152	617484	8900726	1.41	0	0	3.245	0	0	0
26	579469	8906095	1.939	0	1.346	2.86	0	0	2.523
67	588107	8919552	1.992	0.178	0	3.737	0.178	0.178	4.27
61	617848	8916698	2.026	0	0.175	2.619	0	0	0.873
114	612735	8921267	2.15	0	0	3.123	0	0	2.147
48	599641	8896876	2.326	0.117	0	3.041	0.234	0	3.626
29	604225	8900004	2.896	0.087	0.261	1.481	0	0.087	4.269
62	610142	8906682	2.954	0.393	0.236	1.884	0	0	2.512
19	585910	8900572	3.246	0.064	0.127	2.674	0.191	0.127	1.273
27	573104	8913708	4.043	0.242	0.364	2.223	0.242	0.364	2.465
16	616171	8928728	4.161	1.655	0.473	2.412	0.568	0.189	3.736
150	616757	8939160	5.161	0.656	0.525	2.231	0.437	0.962	1.969
155	568321	8892417	5.161	0.713	0.333	2.235	0.475	0.095	1.902
